# Supplementary material for: Plasticity in plastid redox networks: evolution of glutathione-dependent redox cascades and glutathionylation sites
Source: PubMed Central journal article supplement (PMC8256493; doi:10.1186/s12870-021-03087-2), 2021-07-05

**a**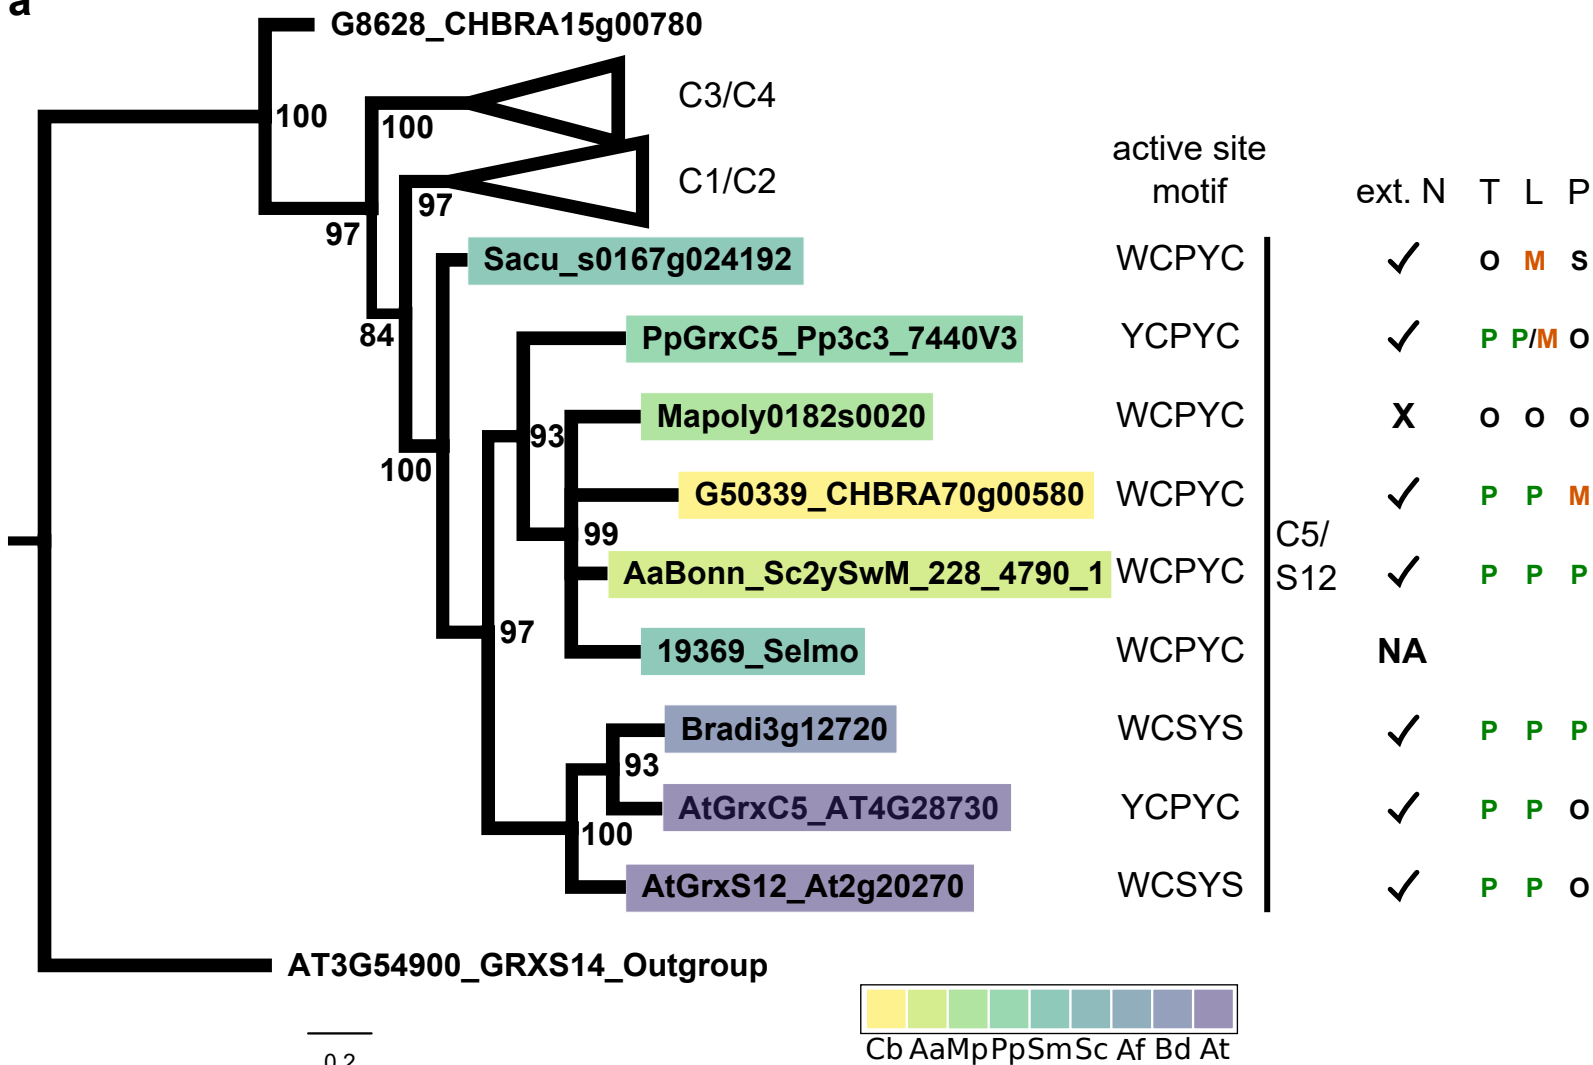**b**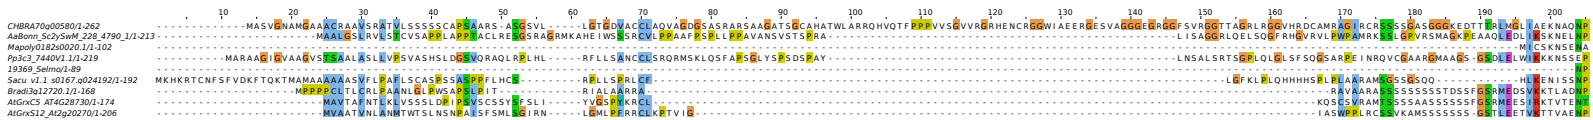

Supplement: 12870_2021_3087_MOESM6_ESM.pdf [file 12870_2021_3087_MOESM6_ESM.pdf]
